# Supplementary material
Source: PubMed Central journal article supplement (PMC7218922)
Supplement: NIHMS1585660-supplement-Appendix.pdf [file NIHMS1585660-supplement-Appendix.pdf]

**Appendix**  
**Prevalence and Correlates of Receiving Medical Advice to Increase Physical Activity in U.S. Adults:**  
**National Health and Nutrition Examination Survey 2013–2016**  
**Zwaid et al.**

**Appendix Table 1.** Descriptive Characteristics of Entire Sample and Adults Missing Data for Health Conditions, NHANES 2013–2016

| Characteristic                                | Total |             | Missing data for health conditions |             |
|-----------------------------------------------|-------|-------------|------------------------------------|-------------|
|                                               | n     | % (SE)      | n                                  | % (SE)      |
| Total                                         | 8,410 | 100.0 (0.0) | 699                                | 100.0 (0.0) |
| Health conditions                             |       |             |                                    |             |
| Obesity                                       |       |             |                                    |             |
| Yes                                           | 3,390 | 39.8 (1.0)  | –                                  | –           |
| No                                            | 5,020 | 60.2 (1.0)  | –                                  | –           |
| Hypertension                                  |       |             |                                    |             |
| Yes                                           | 3,447 | 36.2 (0.9)  | –                                  | –           |
| No                                            | 4,963 | 63.8 (0.9)  | –                                  | –           |
| Diabetes                                      |       |             |                                    |             |
| Yes                                           | 1,570 | 14.1 (0.6)  | –                                  | –           |
| No                                            | 6,840 | 85.9 (0.6)  | –                                  | –           |
| Hypercholesterolemia                          |       |             |                                    |             |
| Yes                                           | 2,716 | 31.5 (0.7)  | –                                  | –           |
| No                                            | 5,694 | 68.5 (0.7)  | –                                  | –           |
| Low HDL cholesterol                           |       |             |                                    |             |
| Yes                                           | 1,599 | 18.7 (0.8)  | –                                  | –           |
| No                                            | 6,811 | 81.3 (0.8)  | –                                  | –           |
| Health behaviors                              |       |             |                                    |             |
| Smoking status                                |       |             |                                    |             |
| Never                                         | 4,804 | 56.4 (0.9)  | 390                                | 54.6 (1.9)  |
| Former                                        | 2,047 | 25.7 (0.8)  | 172                                | 24.6 (1.8)  |
| Current                                       | 1,550 | 18.0 (0.8)  | 136                                | 20.8 (1.8)  |
| Met physical activity guidelines <sup>a</sup> |       |             |                                    |             |
| Yes                                           | 4,825 | 62.1 (0.9)  | 356                                | 53.4 (3.3)  |
| No                                            | 3,539 | 37.9 (0.9)  | 341                                | 46.6 (3.3)  |
| Demographic characteristics                   |       |             |                                    |             |
| Sex                                           |       |             |                                    |             |
| Male                                          | 3,785 | 45.2 (0.5)  | 322                                | 43.8 (2.6)  |
| Female                                        | 4,625 | 54.8 (0.5)  | 377                                | 56.2 (2.6)  |
| Age, years                                    |       |             |                                    |             |
| 20–39                                         | 2,494 | 32.2 (0.9)  | 214                                | 35.1 (2.8)  |
| 40–59                                         | 2,822 | 36.6 (0.9)  | 225                                | 34.8 (1.9)  |
| ≥60                                           | 3,094 | 31.3 (1.0)  | 260                                | 30.1 (2.1)  |
| Race/Hispanic origin <sup>b</sup>             |       |             |                                    |             |
| Hispanic                                      | 2,076 | 12.7 (1.6)  | 137                                | 12.3 (1.3)  |

**Appendix**  
**Prevalence and Correlates of Receiving Medical Advice to Increase Physical Activity in U.S. Adults:**  
**National Health and Nutrition Examination Survey 2013–2016**  
**Zwald et al.**

|                             |       |            |     |            |
|-----------------------------|-------|------------|-----|------------|
| Non-Hispanic white          | 3,409 | 68.2 (2.4) | 223 | 57.1 (3.6) |
| Non-Hispanic black          | 1,737 | 10.8 (1.3) | 213 | 19.0 (2.6) |
| Non-Hispanic Asian          | 913   | 5.1 (0.7)  | 100 | 7.8 (1.6)  |
| Education level             |       |            |     |            |
| Less than high school       | 1,749 | 12.9 (1.1) | 171 | 17.0 (2.1) |
| High school                 | 1,839 | 21.0 (0.8) | 155 | 20.7 (2.3) |
| Some college                | 2,609 | 33.1 (0.9) | 193 | 29.3 (2.2) |
| College degree or higher    | 2,207 | 33.0 (1.9) | 178 | 32.9 (3.3) |
| Poverty status <sup>c</sup> |       |            |     |            |
| <130%                       | 2,408 | 19.1 (1.3) | 236 | 26.9 (2.8) |
| 130%–<350%                  | 2,816 | 32.5 (0.9) | 218 | 31.7 (2.4) |
| ≥350%                       | 2,459 | 41.3 (1.9) | 162 | 31.8 (2.7) |
| Missing                     | 727   | 7.0 (0.5)  | 83  | 9.6 (1.2)  |
| Health insurance status     |       |            |     |            |
| Yes                         | 7,233 | 88.8 (0.8) | 610 | 88.2 (1.2) |
| No                          | 1,165 | 11.2 (0.8) | 87  | 11.8 (1.2) |

*Note:* Entire analytic sample includes non-pregnant adults aged 20 years or older who participated in both the interview and mobile examination center and reported seeing or talking to a healthcare professional in the previous year.

<sup>a</sup>Calculated from the average minutes/week participants reported participating in moderate- or vigorous-intensity PA in a typical week for leisure, work, and transportation, where vigorous PA was doubled and added to moderate PA to compute an equivalent combination of moderate and vigorous PA. Minutes/week were categorized according to the 2008 National Physical Activity Guidelines, where meeting guidelines is  $\geq 150$  minutes/week.

<sup>b</sup>Individuals of “other” race/Hispanic origin were included in the analysis, but percentages and AOR are not shown separately.

<sup>c</sup>Poverty status based on family income-to-poverty ratio.

*Source:* National Health and Nutrition Examination Survey.

HDL, high density lipoprotein; PA, physical activity.
